# Supplementary material
Source: PubMed Central journal article supplement (PMC4294233)
Supplement: IAI.02286-14_zii999091059so5.pdf [file IAI.02286-14_zii999091059so5.pdf]

Table 1: Origin of purified *S. aureus* antigens used for Luminex analyses

| Antigen     | Origin strain   | From          | Article |
|-------------|-----------------|---------------|---------|
| SEA         | A87 0502        | J. Etienne    | 30      |
| SEB         | COL             | B. Bröker     | 29      |
| SEC         | FRI 137         | J. Etienne    | 38      |
| SED         | FRI 137         | J. Etienne    | 38      |
| SEE         | FRI918          | J. Etienne    | 38      |
| SEG         | A99 0372        | J. Etienne    | 38      |
| SEH         | MW2             | J. Etienne    | 38      |
| SEI         | A900322         | J. Etienne    | 38      |
| SEJ         | Fukuoka 5       | J. Etienne    | 38      |
| SEM         | A900322         | B. Bröker     | 29      |
| SEN         | A900322         | J. Etienne    | 38      |
| SEO         | A900322         | B. Bröker     | 29      |
| SEQ         | COL             | B. Bröker     | 29      |
| SER         | Fukuoka 5       | J. Etienne    | 38      |
| SSL 1       | Local strain    | J.D. Fraser   | 50      |
| SSL 3       | Local strain    | J.D. Fraser   | 50      |
| SSL 5       | Local strain    | J.D. Fraser   | 50      |
| SSL 9       | Local strain    | J.D. Fraser   | 50      |
| SSL 11      | Local strain    | J.D. Fraser   | 50      |
| TSST-1      | N315            | B. Bröker     | 29      |
| HlgB        | ATCC 49775      | J. Etienne    | 30      |
| Luk D       | A87 0555        | J. Etienne    | 30      |
| Luk E       | RN4220          | J. Etienne    | 30      |
| Luk F       | ATCC 49775      | J. Etienne    | 30      |
| Luk S       | ATCC 49775      | J. Etienne    | 30      |
| CHIPS       | Newman          | J. van Strijp | 40      |
| Efb         | Newman          | J. van Strijp | 41      |
| SCIN        | Unknown isolate | J. van Strijp | 55      |
| Alpha toxin | Unknown isolate | J. Etienne    |         |
| ETA         | Unknown isolate | J. Etienne    | 42      |
| ETB         | Unknown isolate | J. Etienne    | 42      |
| ClfA        | Newman          | T. Foster     | 43      |
| ClfB        | Newman          | T. Foster     | 43      |
| FnbpA       | NCTC 8325       | T. Foster     | 44      |
| FnbpB       | NCTC 8325       | T. Foster     | 45      |
| IsdA        | Newman          | T. Foster     | 46      |
| IsdH        | NCTC 8325-4     | T. Foster     | 47      |
| SasG        | NCTC 8325-4     | T. Foster     | 48      |
| SdrD        | Newman          | T. Foster     | 49      |
| SdrE        | Newman          | T. Foster     | 43      |
