# Supplementary material
Source: PubMed Central journal article supplement (PMC4294233)
Supplement: IAI.02286-14_zii999091059so6.pdf [file IAI.02286-14_zii999091059so6.pdf]

Table 2A: Significant differences in antistaphylococcal responses between Algerian controls and patients with joint, respiratory or skin infections

|      | Algerian joint vs control |      |      | Algerian respiratory vs control |      |      | Algerian skin vs control |      |      |
|------|---------------------------|------|------|---------------------------------|------|------|--------------------------|------|------|
|      | IgGt                      | IgG1 | IgG4 | IgGt                            | IgG1 | IgG4 | IgGt                     | IgG1 | IgG4 |
| LukE |                           |      |      |                                 |      |      | <i>0,001</i> (b)         |      |      |
| LukS | <i>0,001</i> (a)          |      |      |                                 |      |      | <i>0,001</i> (c)         |      |      |

Values shown are P values, cutoff was at  $p < 0,0013$

**Bold indicates healthy controls have significantly higher MFI values than infected patients**

*Italic indicates infected patients have significantly higher MFI values than healthy controls*
