# Supplementary material
Source: PubMed Central journal article supplement (PMC4294233)
Supplement: IAI.02286-14_zii999091059so7.pdf [file IAI.02286-14_zii999091059so7.pdf]

Table 2B: Significant differences in antistaphylococcal responses between Sudanese controls and patients with skin infections

| Sudanese skin vs control |                  |                  |      |
|--------------------------|------------------|------------------|------|
|                          | IgGt             | IgG1             | IgG4 |
| CfA                      |                  | <b>0,001</b> (b) |      |
| LukS                     | <i>0,001</i> (a) | <i>0,001</i> (c) |      |

Values shown are P values, cutoff was placed at  $p < 0,0013$

**Bold indicates healthy controls have significantly higher MFI values than infected patients**

*Italic indicates infected patients have significantly higher MFI values than healthy controls*

(a) control minimum: 3726 control maximum: 18287 interquartile range 6217

skin minimum: 8040 control maximum: 18936 interquartile range 2912

(b) control minimum: 125, control maximum: 9693, interquartile range 2515

skin minimum: 42, control maximum: 5953, interquartile range 2960

(c) control minimum: 1450, control maximum: 12920, interquartile range 4404

skin minimum: 5254, control maximum: 13125, interquartile range 3034



#NUM!  
#NUM!  
#NUM!
