# Supplementary material
Source: PubMed Central journal article supplement (PMC4294233)
Supplement: IAI.02286-14_zii999091059so8.pdf [file IAI.02286-14_zii999091059so8.pdf]

Table 3A: Number of patients with bacteremia showing increased responses to tested antigens

|        | IgGt | IgG1 | IgG4 |
|--------|------|------|------|
| SEA    | 5    | 5    | 0    |
| SEC    | 6    | 5    | 2    |
| SED    | 7    | 6    | 0    |
| SEE    | 3    | 3    | 0    |
| SEG    | 0    | 0    | 0    |
| SEH    | 3    | 2    | 0    |
| SEI    | 2    | 2    | 0    |
| SEJ    | 5    | 4    | 0    |
| SEM    | 4    | 4    | 0    |
| SEN    | 1    | 1    | 0    |
| SEO    | 0    | 0    | 0    |
| SEQ    | 3    | 3    | 0    |
| SER    | 1    | 1    | 0    |
| SSL1   | 7    | 4    | 5    |
| SSL3   | 4    | 5    | 3    |
| SSL5   | 7    | 4    | 2    |
| SSL9   | 5    | 4    | 5    |
| SSL11  | 2    | 2    | 0    |
| TSST-1 | 7    | 5    | 6    |
| HlgB   | 5    | 3    | 6    |
| LukD   | 8    | 4    | 6    |
| LukE   | 9    | 5    | 5    |
| LukF   | 7    | 4    | 4    |
| LukS   | 6    | 5    | 5    |
| CHIPS  | 6    | 2    | 4    |
| Efb    | 3    | 1    | 0    |
| SCIN   | 5    | 2    | 3    |
| Atox   | 6    | 2    | 1    |
| ETA    | 6    | 5    | 2    |
| ETB    | 2    | 4    | 4    |
| ClfA   | 5    | 4    | 0    |
| ClfB   | 2    | 2    | 0    |
| FnbpA  | 2    | 1    | 0    |
| FnbpB  | 3    | 0    | 0    |
| IsdA   | 6    | 5    | 2    |
| IsdH   | 3    | 3    | 0    |
| SdrD   | 2    | 2    | 0    |
| SdrE   | 2    | 2    | 0    |
