# Supplementary material
Source: PubMed Central journal article supplement (PMC4294233)
Supplement: IAI.02286-14_zii999091059so9.pdf [file IAI.02286-14_zii999091059so9.pdf]

Table 3B: Antigens to which each individual patient undergoing bacteremia responded.

|        | 1                | 2                | 3                | 4                | 5          | 6                |
|--------|------------------|------------------|------------------|------------------|------------|------------------|
| SEA    | IgGt, IgG1       | IgGt, IgG1       |                  | IgGt, IgG1       |            | IgGt, IgG1       |
| SEC    | IgGt, IgG1       | IgGt, IgG1, IgG4 | IgGt, IgG1       |                  | IgGt, IgG1 | IgGt             |
| SED    | IgGt, IgG1       |                  | IgGt, IgG1       | IgGt, IgG1       | IgGt, IgG1 | IgGt, IgG1       |
| SEE    | IgGt, IgG1       |                  |                  |                  |            | IgGt, IgG1       |
| SEG    |                  |                  |                  |                  |            |                  |
| SEH    | IgGt, IgG1       |                  |                  |                  |            | IgGt, IgG1       |
| SEI    |                  |                  |                  | IgGt, IgG1       |            | IgGt, IgG1       |
| SEJ    |                  |                  | IgGt, IgG1       | IgGt, IgG1       |            |                  |
| SEM    |                  |                  |                  | IgGt, IgG1       |            | IgGt, IgG1       |
| SEN    |                  |                  |                  |                  |            |                  |
| SEO    |                  |                  |                  |                  |            |                  |
| SEQ    | IgGt, IgG1       |                  |                  |                  |            | IgGt, IgG1       |
| SER    |                  |                  |                  |                  | IgGt, IgG1 |                  |
| SSL1   |                  | IgGt, IgG1, IgG4 | IgGt, IgG4       |                  | IgGt, IgG1 | IgGt, IgG4       |
| SSL3   | IgG1             | IgGt, IgG1       | IgG4             | IgGt, IgG1, IgG4 |            | IgGt, IgG1       |
| SSL5   |                  | IgGt, IgG1       |                  | IgGt, IgG4       | IgGt       | IgGt, IgG1, IgG4 |
| SSL9   | IgGt, IgG1       | IgGt, IgG1, IgG4 | IgG4             | IgGt, IgG4       | IgGt       | IgGt, IgG1, IgG4 |
| SSL11  |                  |                  |                  |                  | IgGt, IgG1 |                  |
| TSST-1 | IgGt, IgG4       | IgGt, IgG1, IgG4 | IgG1, IgG4       | IgGt, IgG1, IgG4 |            | IgGt             |
| HlgB   | IgG1, IgG4       | IgGt, IgG1, IgG4 | IgG4             | IgG4             | IgGt, IgG4 | IgGt, IgG1       |
| LukD   | IgGt, IgG1, IgG4 | IgGt, IgG1, IgG4 | IgG4             | IgGt, IgG1, IgG4 | IgGt       | IgGt, IgG1       |
| LukE   | IgGt, IgG1, IgG4 | IgGt, IgG1, IgG4 | IgGt, IgG1, IgG4 | IgGt, IgG1, IgG4 | IgGt       | IgGt, IgG1       |
| LukF   |                  | IgGt, IgG1, IgG4 | IgGt, IgG4       | IgGt, IgG1       | IgGt       | IgGt, IgG1, IgG4 |
| LukS   | IgG1             | IgGt, IgG1, IgG4 | IgG1, IgG4       | IgGt, IgG1, IgG4 | IgGt, IgG4 | IgGt, IgG1, IgG4 |
| CHIPS  |                  | IgGt, IgG1, IgG4 | IgGt             | IgGt, IgG4       |            | IgGt, IgG4       |
| Efb    | IgGt             |                  | IgGt             |                  |            |                  |
| SCIN   | IgGt             | IgGt, IgG1, IgG4 |                  | IgGt, IgG1, IgG4 | IgGt, IgG4 |                  |
| Atox   | IgGt             |                  |                  | IgGt, IgG1       | IgGt       |                  |
| ETA    | IgG1             | IgGt, IgG1, IgG4 | IgGt, IgG1       | IgGt             |            | IgGt, IgG1       |
| ETB    | IgG1, IgG4       | IgGt, IgG1, IgG4 |                  |                  |            | IgG4             |
| ClfA   | IgGt, IgG1       | IgGt, IgG1       |                  | IgGt             |            | IgGt, IgG1       |
| ClfB   |                  | IgGt, IgG1       |                  | IgGt, IgG1       |            |                  |
| FnbpA  |                  |                  |                  | IgGt, IgG1       |            |                  |
| FnbpB  |                  |                  | IgGt             | IgGt             |            |                  |
| IsdA   |                  | IgGt, IgG1       | IgGt, IgG1       | IgG1, IgG4       | IgGt       | IgGt, IgG1       |
| IsdH   |                  |                  |                  | IgG1             | IgGt       | IgGt, IgG1       |
| SdrD   |                  | IgGt, IgG1       | IgGt             |                  |            |                  |
| SdrE   |                  | IgGt, IgG1       |                  |                  |            |                  |

|        | 7                | 8                | 9              | 10         |
|--------|------------------|------------------|----------------|------------|
| SEA    | IgGt, IgG1       |                  |                |            |
| SEC    |                  | IgGt, IgG1       | IgG4           |            |
| SED    | IgGt, IgG1       | IgGt             |                |            |
| SEE    | IgGt, IgG1       |                  |                |            |
| SEG    |                  |                  |                |            |
| SEH    |                  |                  |                | IgGt       |
| SEI    |                  |                  |                |            |
| SEJ    | IgGt, IgG1       | IgGt, IgG1       | IgGt           |            |
| SEM    | IgGt, IgG1       | IgGt, IgG1       |                |            |
| SEN    | IgGt, IgG1       |                  |                |            |
| SEO    |                  |                  |                |            |
| SEQ    |                  |                  | IgGt, IgG1     |            |
| SER    |                  |                  | IgG1           |            |
| SSL1   | IgGt, IgG4       | IgGt, IgG1       | IgGt, IgG4     |            |
| SSL3   |                  | IgGt, IgG1       | IgG4           |            |
| SSL5   | IgGt, IgG1       | IgGt             | IgGt, IgG1     |            |
| SSL9   | IgG4             | IgGt, IgG1       |                |            |
| SSL11  |                  |                  | IgGt, IgG1     |            |
| TSST-1 |                  | IgGt, IgG1       | Gt, IgG1, IgG4 | IgGt       |
| HlgB   | IgGt             |                  | IgGt, IgG4     |            |
| LukD   | IgGt, IgG4       | IgGt             | , IgG4         |            |
| LukE   | IgGt             |                  | IgGt, IgG4     | IgGt       |
| LukF   | IgGt, IgG1       | IgGt             | IgGt, IgG4     |            |
| LukS   | IgGt             | IgGt             |                |            |
| CHIPS  |                  | IgG1             | IgGt, IgG4     | IgGt       |
| Efb    |                  |                  | IgG1           |            |
| SCIN   |                  | IgGt             |                |            |
| Atox   | IgGt             | IgGt             | Gt, IgG1, IgG4 |            |
| ETA    |                  | IgGt, IgG1, IgG4 |                | IgGt       |
| ETB    |                  | IgGt, IgG1, IgG4 |                | IgGt, IgG1 |
| ClfA   |                  |                  | IgGt, IgG1     |            |
| ClfB   |                  |                  |                |            |
| FnbpA  | IgGt, IgG1       |                  |                |            |
| FnbpB  | IgGt, IgG1       |                  |                |            |
| IsdA   | IgGt, IgG1, IgG4 | IgGt             |                |            |
| IsdH   | IgGt, IgG1       |                  |                |            |
| SdrD   |                  | IgG1             |                |            |
| SdrE   |                  |                  | IgGt, IgG1     |            |
