# Supplementary material
Source: PubMed Central journal article supplement (PMC4294233)
Supplement: IAI.02286-14_zii999091059so10.pdf [file IAI.02286-14_zii999091059so10.pdf]

Table 3C: Significant differences in antistaphylococcal responses between Dutch persistent nasal carriers and non-carriers:

| Dutch carriers vs non carriers |                  |                  |                  |
|--------------------------------|------------------|------------------|------------------|
|                                | IgGt             | IgG1             | IgG4             |
| TSST-1                         | <i>0,001 (a)</i> | <i>0,001 (b)</i> | <i>0,001 (c)</i> |

Values shown are P values, cutoff was placed at  $p < 0,0013$

**Bold indicates non carriers have significantly higher MFI values than carriers**

*Italic indicates carriers have significantly higher MFI values than non-carriers*

(a) carriers minimum: 4214 control maximum: 17047, interquartile range 4277  
non-carriers minimum: 19, control maximum: 15335, interquartile range 9498

(b) carriers minimum: 1628 control maximum: 7744 interquartile range 1274  
non-carriers minimum: 9,5 control maximum: 7398 interquartile range 4397

(c) carriers minimum: 3250, control maximum: 10137, interquartile range 3967  
non-carriers minimum: 7, control maximum: 5557 interquartile range 3099
