# Supplementary material
Source: PubMed Central journal article supplement (PMC4294233)

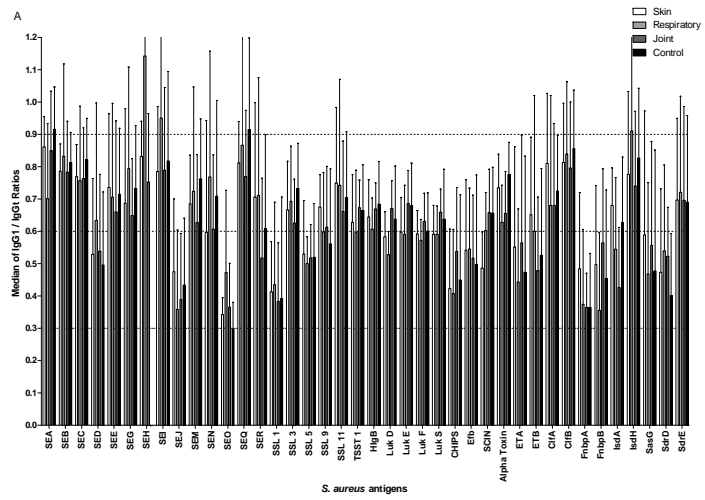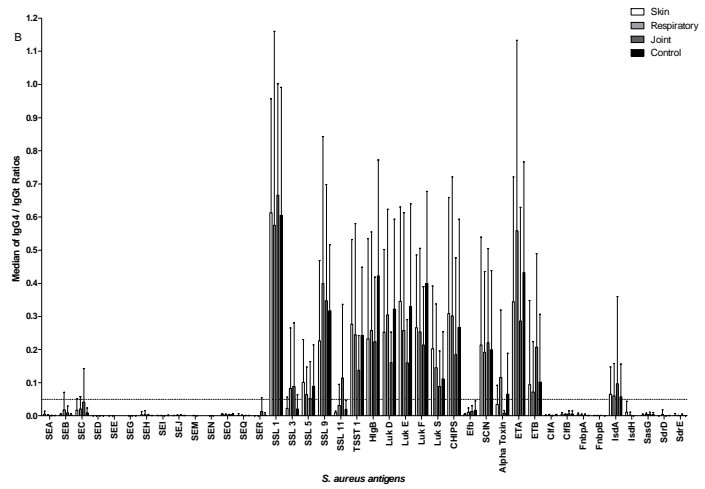

Supplement: IAI.02286-14_zii999091059so2.pdf [file IAI.02286-14_zii999091059so2.pdf]

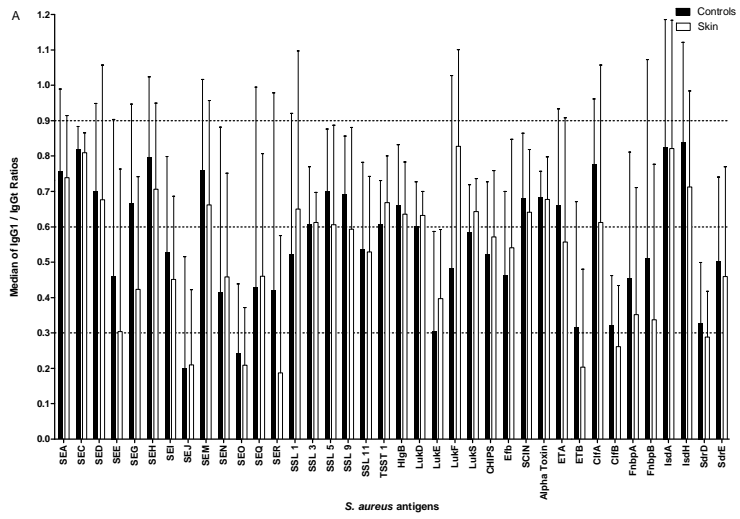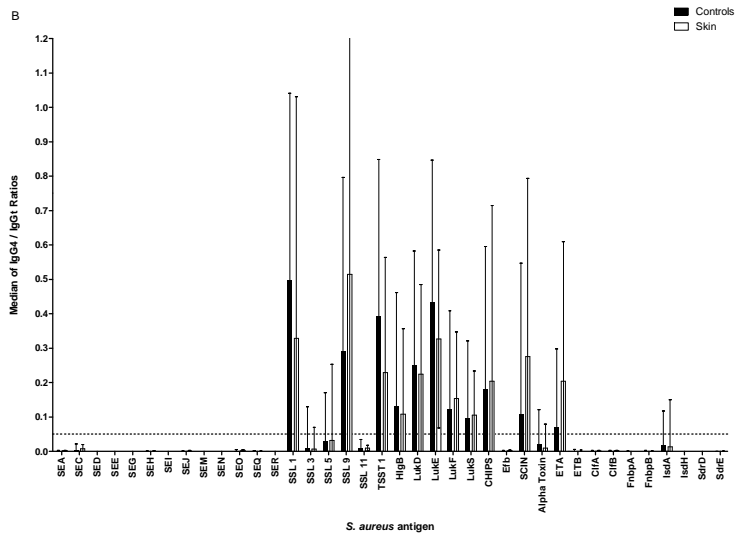

Supplement: IAI.02286-14_zii999091059so3.pdf [file IAI.02286-14_zii999091059so3.pdf]

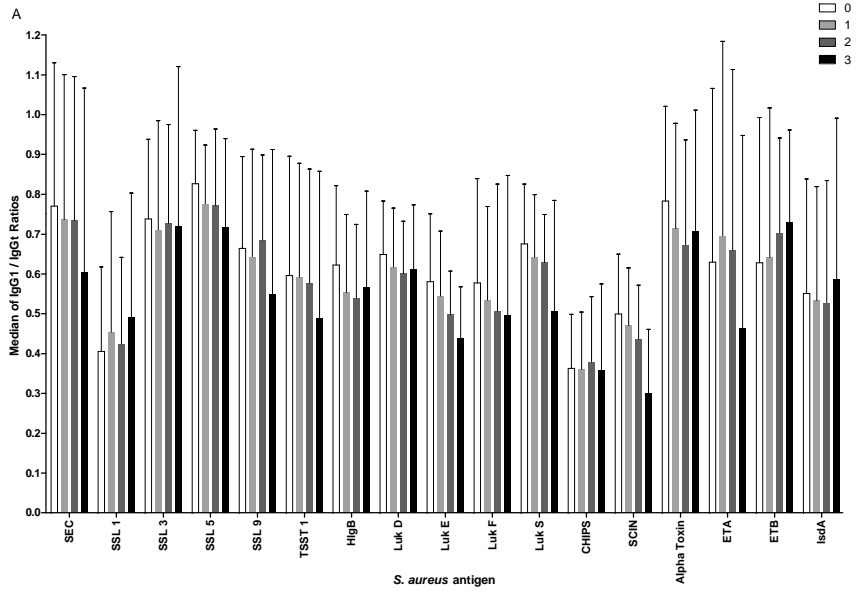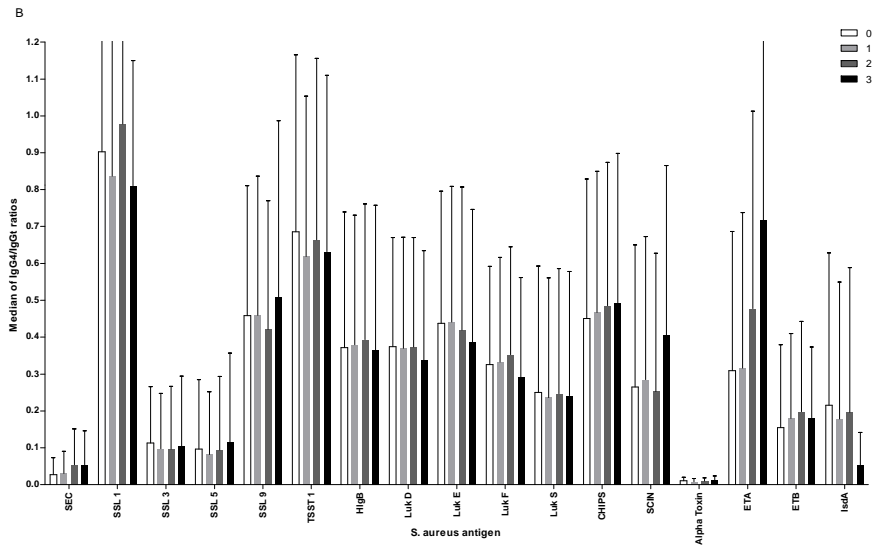

Supplement: IAI.02286-14_zii999091059so4.pdf [file IAI.02286-14_zii999091059so4.pdf]
